# Supplementary material
Source: PubMed Central journal article supplement (PMC2593683)
Supplement: pp.108.124099_1.pdf [file pp.108.124099_1.pdf]

Lti29 and Cor47 phosphorylated for 6 hours with CKII.

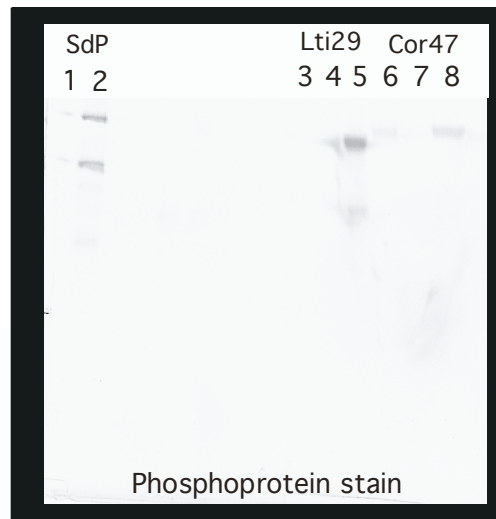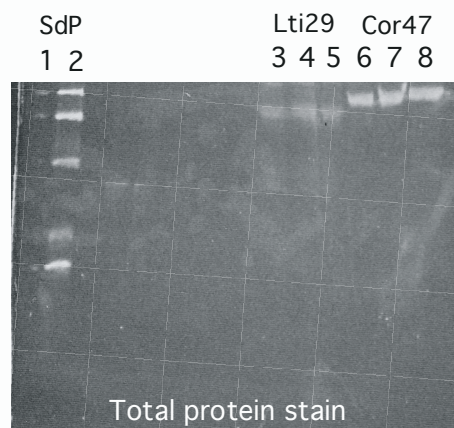

SdP= Protein standards including phosphorylated proteins

Lanes:

1&2 = SdP different concentrations

3 = Lti29 (non phosphorylated)

4 = Lti29 + boiled (inactivated) CKII

5 = Lti29 + CKII

6 = Cor47+ boiled (inactivated) CKII

7 = Cor47 (non phosphorylated)

8 = Cor47 + CKII

Supplementary Figure 1.
