# Supplementary material
Source: PubMed Central journal article supplement (PMC2593683)
Supplement: pp.108.124099_4.pdf [file pp.108.124099_4.pdf]

| Co-solute       | Effect on disordered proteins                                                                                                                                                                  | Effect on denatured globular proteins                                                                                                                                                                                                                                                                             | Effect on other systems                                                                                           |
|-----------------|------------------------------------------------------------------------------------------------------------------------------------------------------------------------------------------------|-------------------------------------------------------------------------------------------------------------------------------------------------------------------------------------------------------------------------------------------------------------------------------------------------------------------|-------------------------------------------------------------------------------------------------------------------|
| <i>Dextrans</i> | <ol style="list-style-type: none"> <li>1. No effects on p27<sup>KIP1</sup> or c-FOS<sup>3</sup>.</li> <li>2. Folding of TCAM RNase<sup>4</sup>.</li> </ol>                                     | <ol style="list-style-type: none"> <li>1. Increased refolding (<math>k_f</math>) of lysosyme<sup>1</sup>.</li> <li>2. Change to molten globular state of cyt C<sup>2</sup>.</li> </ol>                                                                                                                            | <ol style="list-style-type: none"> <li>1. Decreased unfolding (<math>k_u</math>) of GAPDH<sup>5</sup>.</li> </ol> |
| <i>Ficolls</i>  | <ol style="list-style-type: none"> <li>1. No effects on p27<sup>KIP1</sup> or c-FOS<sup>3</sup>.</li> <li>2. No effects on TCAM RNase stability (<math>K_{D-N}</math>)<sup>4</sup>.</li> </ol> | <ol style="list-style-type: none"> <li>1. Minor effect on FKB12 stability<sup>6</sup>.</li> <li>2. Minor effect on refolding (<math>k_f</math>) of lysosymes<sup>7</sup>.</li> </ol>                                                                                                                              |                                                                                                                   |
| <i>EG/PEGs</i>  | <ol style="list-style-type: none"> <li>1. Accelerated fibrillation of <math>\alpha</math>-synuclein<sup>10</sup>.</li> </ol>                                                                   | <ol style="list-style-type: none"> <li>1. Collapse of the coil state (decreased <math>k_f</math>) of CI2 at high PEG<sup>8</sup>.</li> <li>2. Increased folding rate (<math>k_f</math>) of CI2 at low PEG<sup>8</sup>.</li> <li>3. Decreased folding rate (<math>k_f</math>) of CspB (EG)<sup>9</sup>.</li> </ol> | <ol style="list-style-type: none"> <li>1. Decreased unfolding (<math>k_u</math>) of GAPDH<sup>5</sup>.</li> </ol> |
| <i>Glycerol</i> | <ol style="list-style-type: none"> <li>1. Accelerated fibrillation of <math>\alpha</math>-synuclein<sup>10</sup>.</li> </ol>                                                                   | <ol style="list-style-type: none"> <li>1. Stabilised native state of RNaseA<sup>11</sup>.</li> <li>2. Increased refolding (<math>k_f</math>) of GS with GroEL<sup>12</sup>.</li> <li>3. Increased refolding (<math>k_f</math>) of MHD<sup>13</sup>.</li> </ol>                                                    |                                                                                                                   |
| <i>Glucose</i>  | <ol style="list-style-type: none"> <li>2. Induced collapse of <math>\alpha</math>-synuclein<sup>14</sup>.</li> </ol>                                                                           | <ol style="list-style-type: none"> <li>1. Folding of Fe cyt C<sup>14</sup>.</li> </ol>                                                                                                                                                                                                                            | <ol style="list-style-type: none"> <li>1. Stabilised dimeric chymotrypsin<sup>15</sup>.</li> </ol>                |
| <i>Sucrose</i>  | <ol style="list-style-type: none"> <li>1. Contracted RCAM RNase<sup>17</sup>.</li> </ol>                                                                                                       | <ol style="list-style-type: none"> <li>1. Increased refolding (<math>k_f</math>) of GS<sup>12</sup>.</li> <li>2. Increased refolding (<math>k_f</math>) of CI2<sup>16</sup>.</li> <li>3. Increased refolding (<math>k_f</math>) of MHD<sup>13</sup>.</li> </ol>                                                   | <ol style="list-style-type: none"> <li>2. Stabilised dimeric chymotrypsin<sup>15</sup>.</li> </ol>                |

1. Zhou BR, Liang Y, Du F, Zhou Z, & Chen J. (2004) *J Biol Chem* **279**, 55109–16.
2. Sasahara K, McPhie P, & Minton, AP. (2003) *J Mol Biol* **326**, 1227–37.
3. Flaugh SL, & Lumb KJ. (2001) *Biomacromolecules* **2**, 538–40.
4. Qu Y, & Bolen DW. (2002) *Biophys Chem* **101–102**, 155–65.
5. Ren G, Lin Z, Tsou CL, & Wang CC. (2003) *J Protein Chem* **22**, 431–9.
6. Spencer DS, Xu K, Logan TM, & Zhou HX. (2005) *J Mol Biol* **351**, 219–32.
7. Van den Berg B, Wain R, Dobson CM, & Ellis RJ. (2000) *Embo J* **19**, 3870–5.
8. Silow M, & Oliveberg M. (2003) *J Mol Biol* **326**, 263–71.
9. Jacob M, Geeves M, Holtermann G, & Schmid FX. (1999) *Nat Struct Biol* **6**, 923–6.
10. Munishkina LA, Cooper EM, Uversky VN, & Fink AL. (2004) *J Mol Recognit* **17**, 456–64.
11. Gekko K, & Ito H. (1990) *J Biochem (Tokyo)* **107**, 572–7.
12. Voziyani PA, & Fisher MT. (2002) *Arch Biochem Biophys* **397**, 293–7.
13. Tieman BC, Johnston MF, & Fisher MT. (2001) *J Biol Chem* **276**, 44541–50.
14. Morar AS, Olteanu A, Young GB, & Pielak GJ. (2001) *Protein Sci* **10**, 2195–9.
15. Patel CN, Noble SM, Weatherly GT, Tripathy A, Winzor DJ, & Pielak GJ. (2002) *Protein Sci* **11**, 997–1003.
16. Ladurner AG, & Fersht AR. (1999) *Nat Struct Biol* **6**, 28–31.
17. Qu Y, Bolen CL, & Bolen DW. (1998) *Proc Natl Acad Sci U S A* **95**, 9268–73.
